# Supplementary material for: Interactions between trade wind clouds and local forcings over the Great Barrier Reef: a case study using convection-permitting simulations
Source: Copernicus journal article supplement (doi:10.5194/acp-24-5713-2024), 2024-05-17
Supplement: Supplementary file 1 [file acp-24-5713-2024-supplement.pdf]

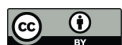

*Supplement of*

## **Interactions between trade wind clouds and local forcings over the Great Barrier Reef: a case study using convection-permitting simulations**

**Wenhui Zhao et al.**

*Correspondence to:* Wenhui Zhao ([wenhui.zhao@unimelb.edu.au](mailto:wenhui.zhao@unimelb.edu.au))

The copyright of individual parts of the supplement might differ from the article licence.

## Supplementary

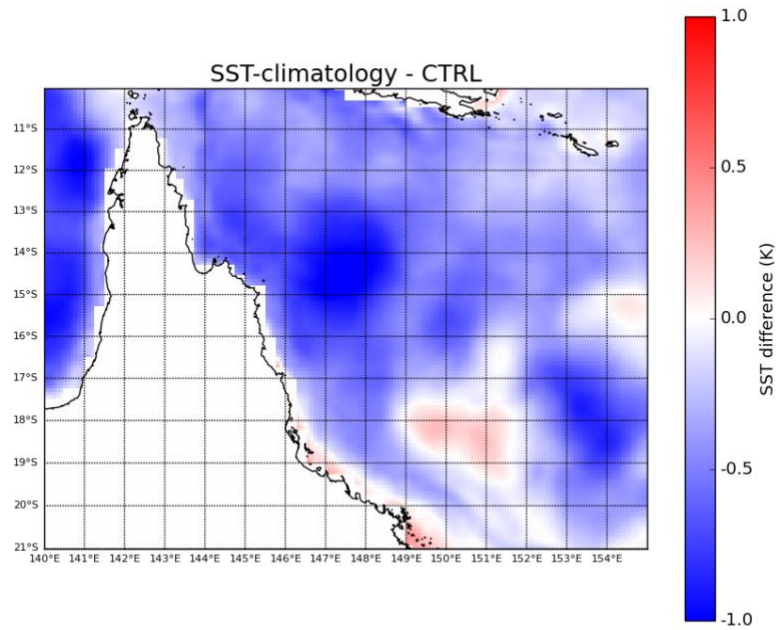

*Figure S1: SST difference between experiment of SST-climatology and CTRL simulation. Climatological SST distribution is for April during the time period of 1998-2018. Areas in blue color indicate regions where SST in the SST-climatology simulation is cooler than CTRL simulation, and warmer than CTRL area is in red.*

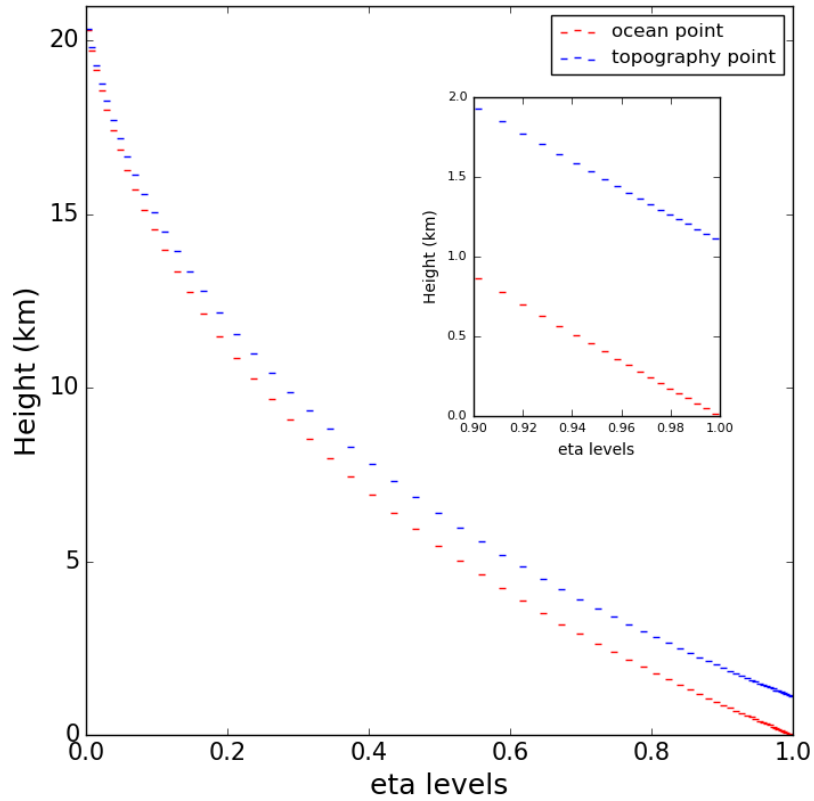

Figure S2: Examples of vertical eta levels structure for the 65-level configurations in the WRF model. Red color is for a grid point located in ocean area, and blue is for a grid point with topography.

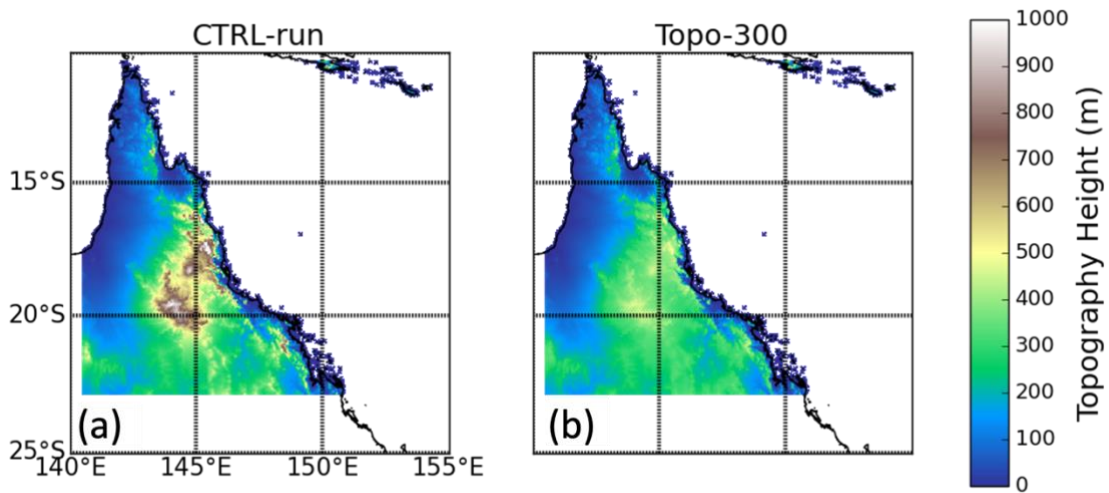

Figure S3: (a) The model topography for CTRL. (b) Modified topography for Topo300 experiment, where the topography above 300m is reduced by 75%.

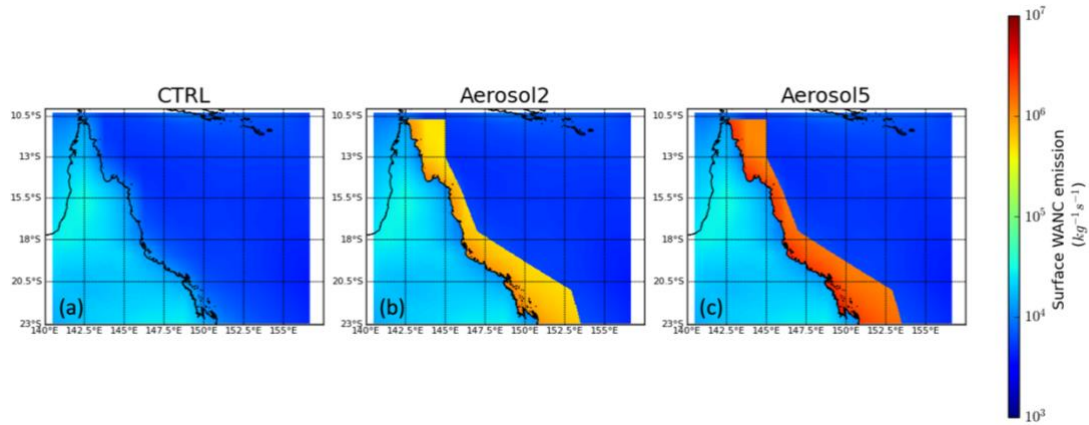

Figure S4: (a) Example of surface water-friendly aerosol number concentration emission (NWFA2D) applied in CTRL. (b) Modified NWFA2D from Aerosol2, where the NWFA2D within GBR is doubled. (c) Same as (b), but for Aerosol5, where a factor of five is applied over the GBR. Note that NWFA2D keeps unchanged throughout the evolution of simulation for all experiments.

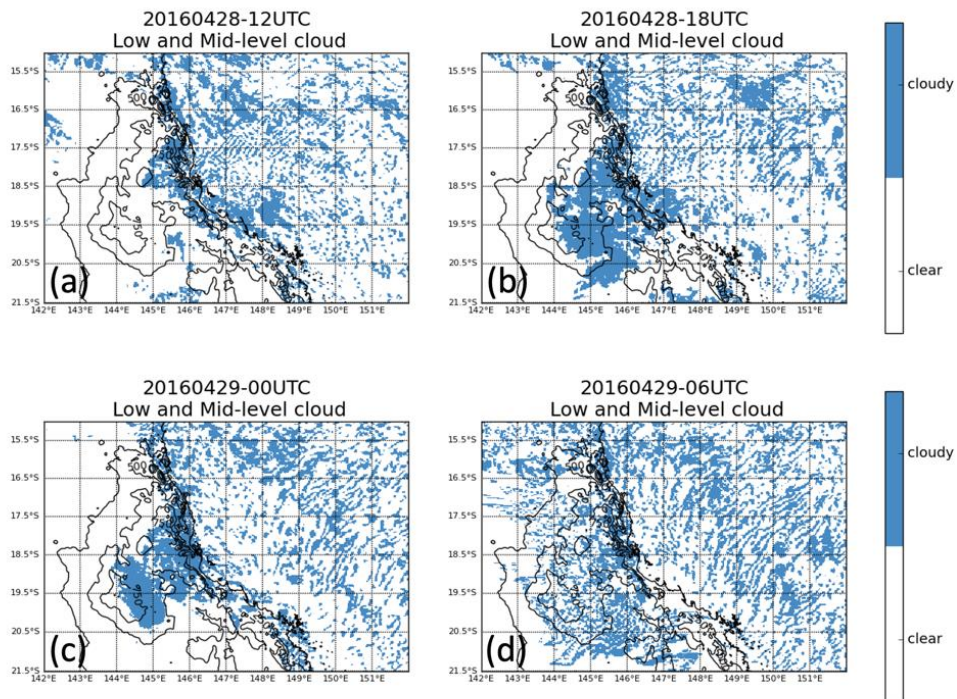

Figure S5: Examples of simulated cloud fields from 3km resolution with CTRL at (a) 12UTC 28, (b) 18UTC 28, (c) 00UTC 29, and (d) 06UTC 29 April 2016.

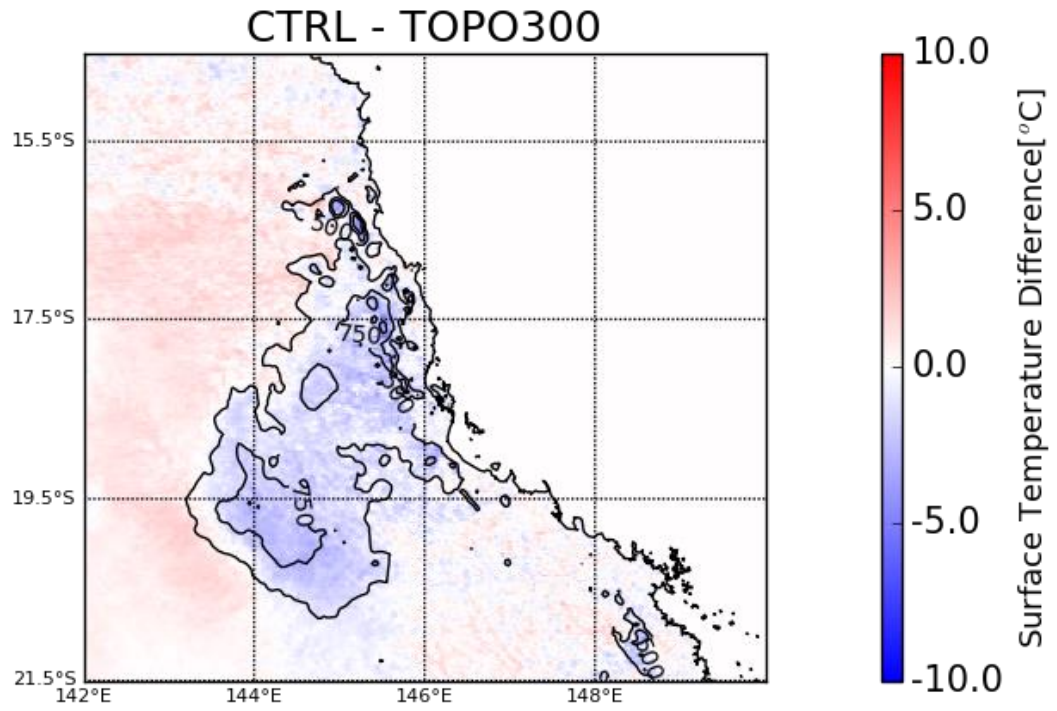

*Figure S6: Differences of simulated surface temperature between CTRL and Topo300. Black contours show the topography from 500 to 1500 m with 250 m interval.*
